# Supplementary material for: Chemical Doping of a Silica Matrix with a New Organic Dye from the Group of Heterocyclic Compounds—Chemical, Optical and Surface Characteristics
Source: MDPI journal article supplement (doi:10.3390/cryst12040478), 2022-03-30
Supplement: s1 [file s1]

## *Supplementary Materials*

### **Chemical doping of a silica matrix with a new organic dye from the group of heterocyclic compounds – chemical, optical and surface characteristics**

Katarzyna Wojtasik<sup>1,\*</sup>, Magdalena Zięba<sup>2,\*</sup>, Michał Wojtasik<sup>3</sup>, Cuma Tyszkiewicz<sup>2</sup>, Monika Pokladko-Kowar<sup>1</sup>, Ewa Gondek<sup>1</sup>, Andrzej Danel<sup>1</sup>, Paweł Karasiński<sup>2</sup>

<sup>1</sup> Cracow University of Technology, Faculty of Materials Engineering and Physics, Podchorążych 1, 30-084 Kraków, Poland

<sup>2</sup> Silesian University of Technology, Faculty of Electrical Engineering, B. Krzywoustego 2, 44-100 Gliwice, Poland

<sup>3</sup> Oil and Gas Institute – National Research Institute, Lubicz 25A, 31-503 Kraków, Poland

\*correspondence: katarzyna.wojtasik@pk.edu.pl (KW), magdalena.zieba@polsl.pl (MZ)

#### Table of contents

|                                                                                                                         |    |
|-------------------------------------------------------------------------------------------------------------------------|----|
| <sup>1</sup> H NMR spectra .....                                                                                        | S2 |
| Figure S1. <sup>1</sup> H NMR spectra for PQXOMe.....                                                                   | S2 |
| Figure S2. <sup>1</sup> H NMR spectra for PQXOH .....                                                                   | S2 |
| <sup>13</sup> C NMR spectra .....                                                                                       | S3 |
| Figure S3. <sup>13</sup> C NMR spectra for PQXMe .....                                                                  | S3 |
| Figure S4. <sup>13</sup> C NMR spectra for PQXOH .....                                                                  | S3 |
| FTIR spectra.....                                                                                                       | S4 |
| Figure S5. FTIR spectra for PQXOMe .....                                                                                | S4 |
| Figure S6. FTIR spectra for PQXOH.....                                                                                  | S4 |
| Absorption and photoluminescence .....                                                                                  | S5 |
| Figure S7. Normalized absorbance for PQXOH dye in solvents of different polarity .....                                  | S5 |
| Figure S8. Normalized photoluminescence for PQXOH dye in solvents of different polarity (λ <sub>ex</sub> =365 nm) ..... | S5 |

## <sup>1</sup>H NMR spectra

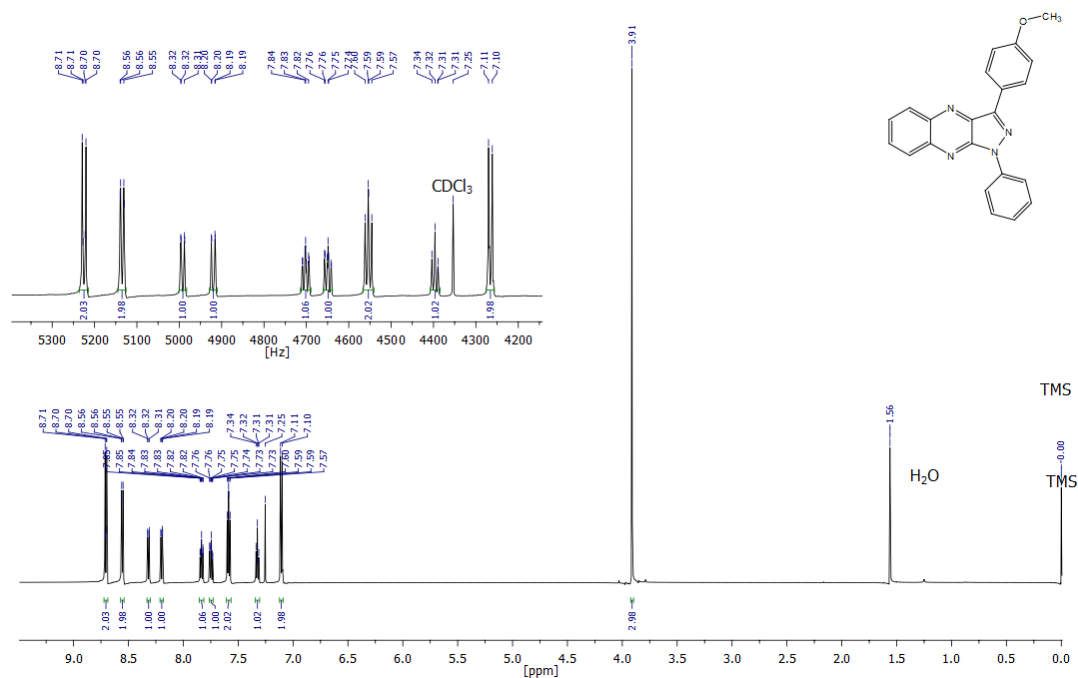

Figure S1. <sup>1</sup>H NMR spectra for PQXOMe

<sup>1</sup>H NMR (400 MHz, DMSO-*d*) 8.51 (d, *J* = 8.6 Hz, 2H), 8.45 (d, *J* = 7.8 Hz, 2H), 8.31 (d, *J* = 8.4 Hz, 1H), 8.18 (d, *J* = 8.4 Hz, 1H), 7.97 - 7.94 (m, 1H), 7.87 - 7.85 (m, 1H), 7.64 (t, *J* = 7.7 Hz, 2H), 7.38 (t, *J* = 7.3 Hz, 1H), 7.02 (d, *J* = 8.6 Hz, 2H), 3.46 (s, -OH + H<sub>2</sub>O from DMSO-*d*)

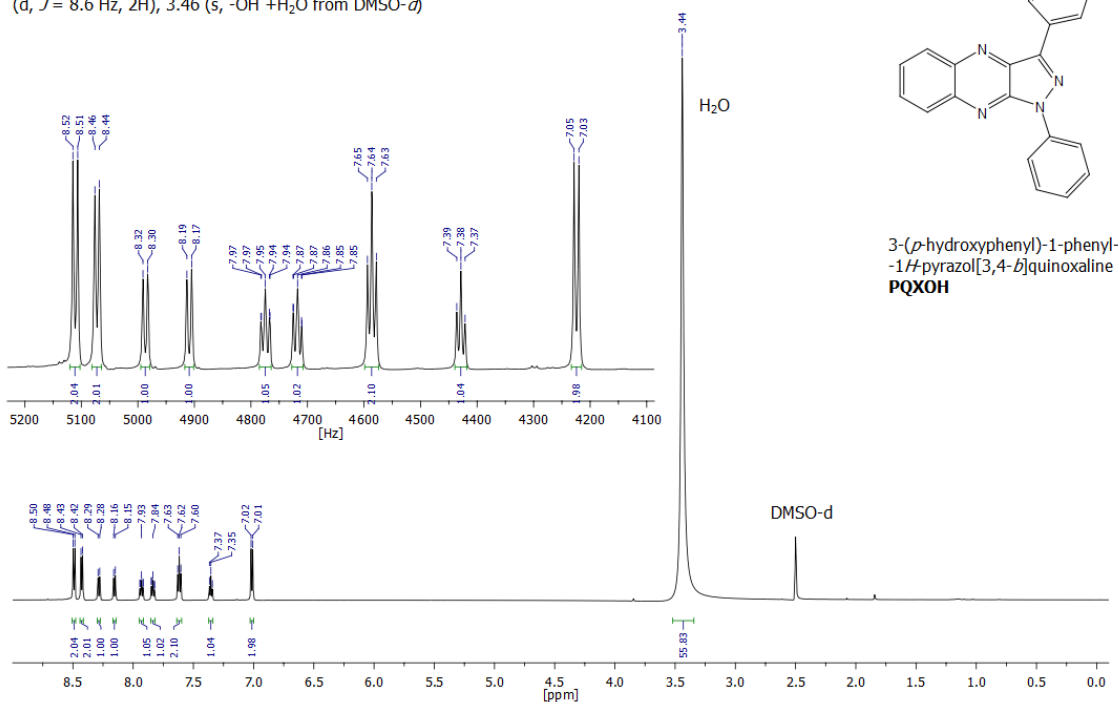

Figure S2. <sup>1</sup>H NMR spectra for PQXOH

## <sup>13</sup>C NMR spectra

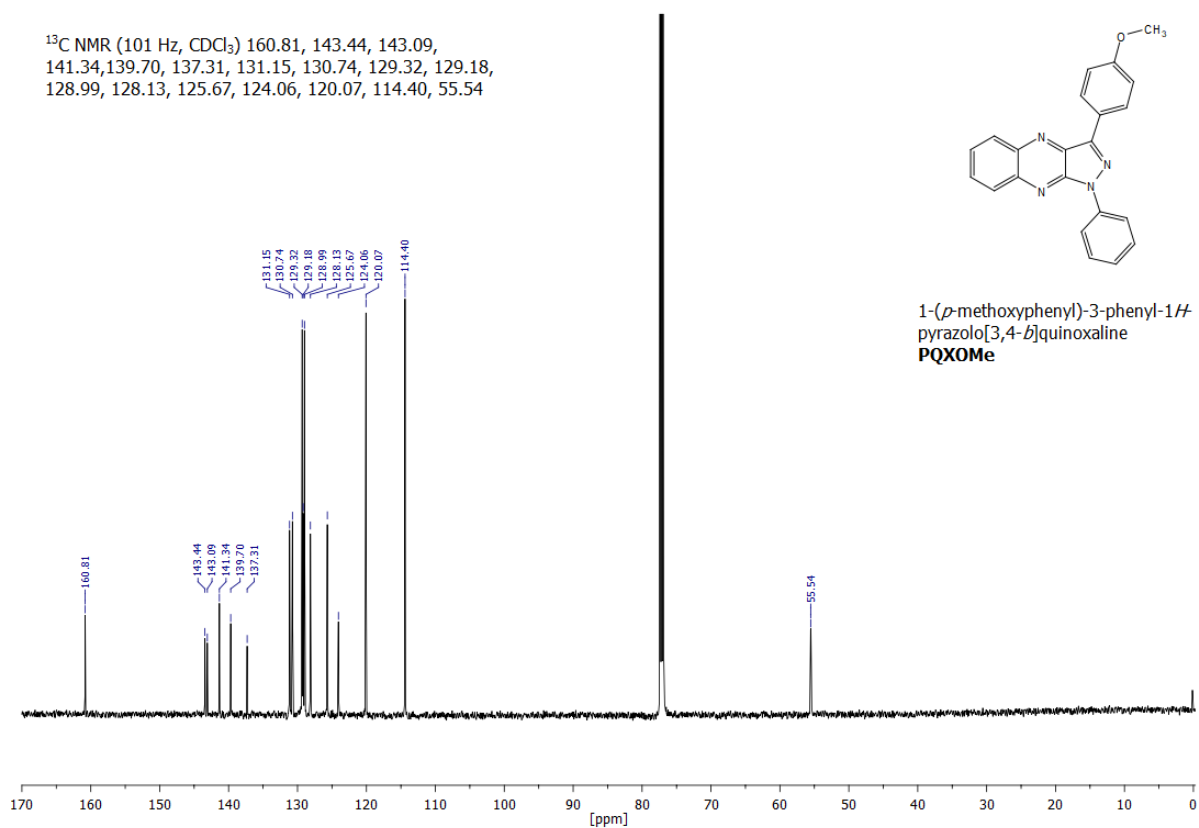

Figure S3. <sup>13</sup>C NMR spectra for PQXMe

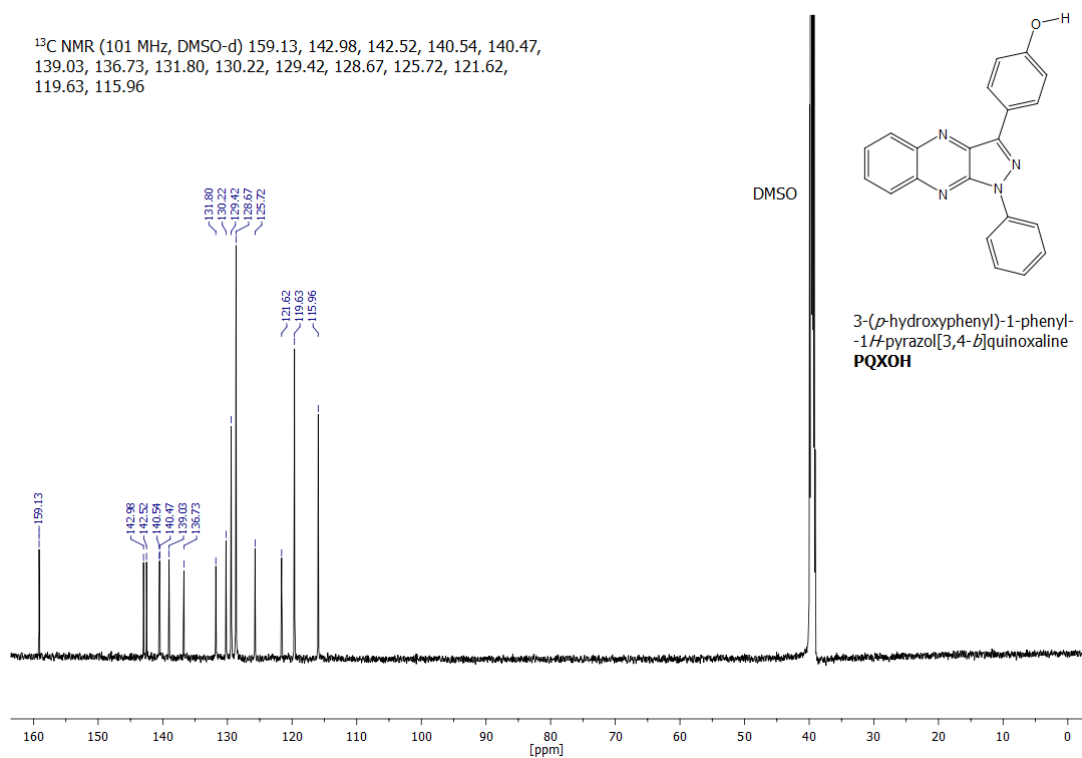

Figure S4. <sup>13</sup>C NMR spectra for PQXOH

## FTIR spectra

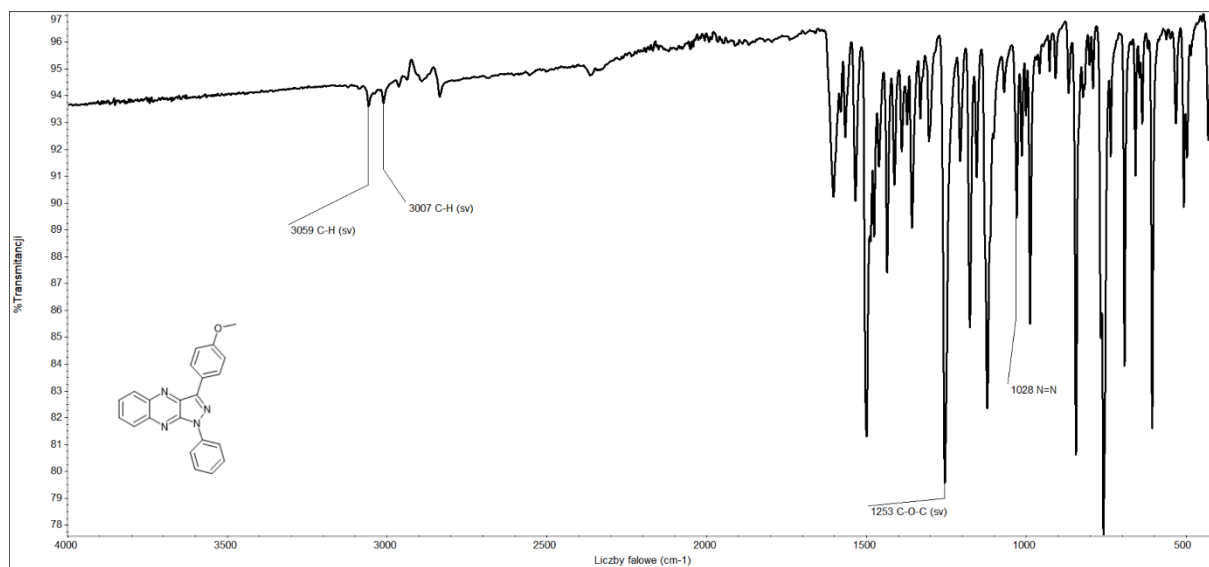

Figure S5. FTIR spectra for PXMOMe

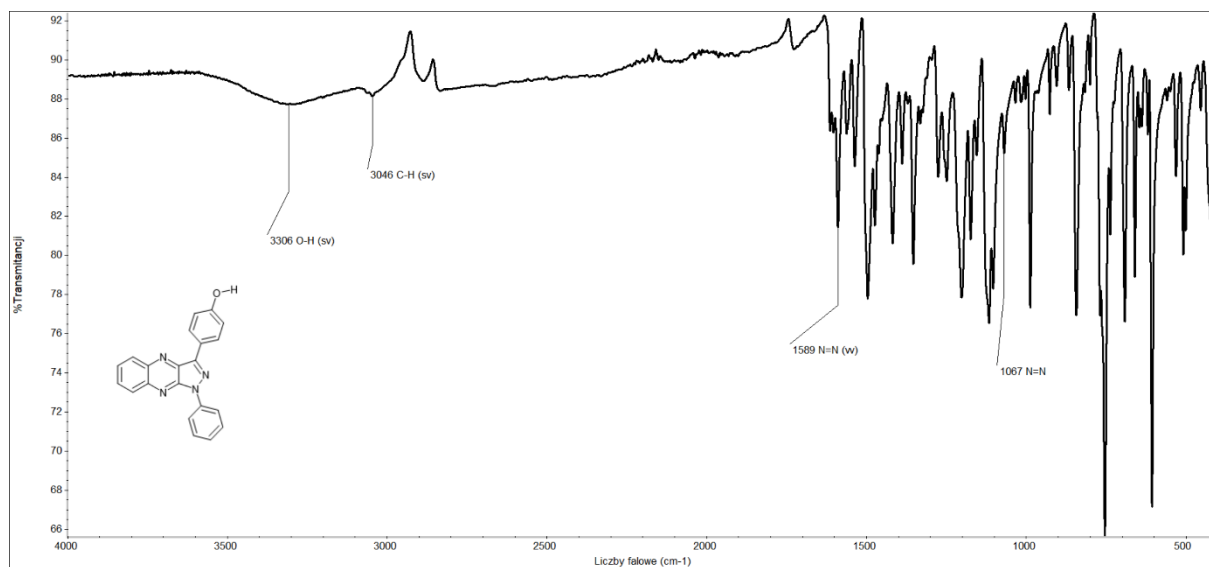

Figure S6. FTIR spectra for PXXOH

## Absorption and photoluminescence

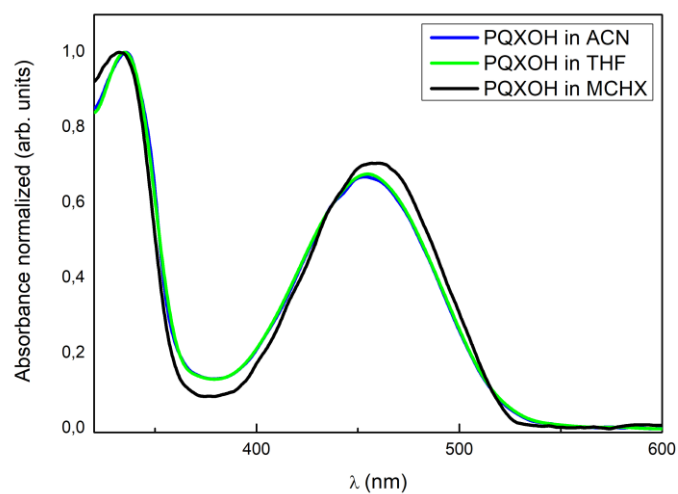

**Figure S7. Normalized absorbance for PQXOH dye in solvents of different polarity**

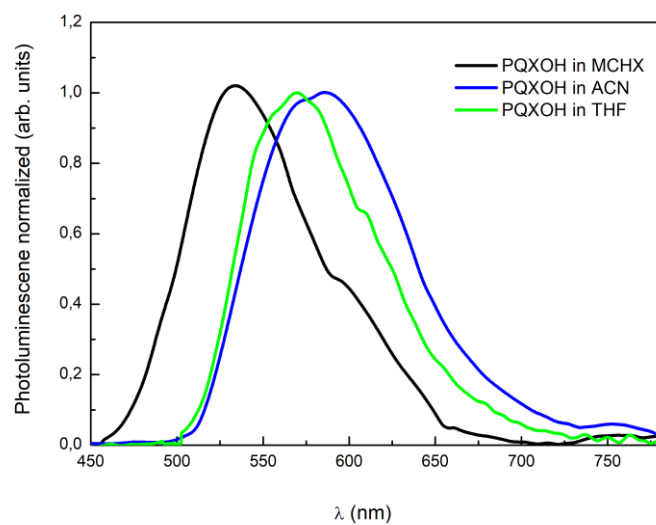

**Figure S8. Normalized photoluminescence for PQXOH dye in solvents of different polarity ( $\lambda_{\text{ex}}=365$  nm)**
